# Supplementary material for: Feeding Behavior and Virus-transmission Ability of Insect Vectors Exposed to Systemic Insecticides
Source: Plants (Basel). 2020 Jul 15;9(7):895. doi: 10.3390/plants9070895 (PMC7411831; doi:10.3390/plants9070895)
Supplement: Supplementary file 1 [file plants-09-00895-s001.xlsx]

## Sheet: CONTROL
	Number of np	Number of probes	Number of C	Number of G	Number of E1	Number of E2	Number of sustained E2 (longer than 10 minutes)	Number of probes to the 1st E1	Number of probes after 1st E	Total duration of np	Total probing time	Total duration of C	Duration of G	Total duration of E1	Total duration of E2	Total duration of E	Time to 1st probe from start of EPG	Time from start of EPG to 1st Ey	Time from 1st probe to 1st Ey	Time from the beginning of that probe to 1st Ey	Time to from start of EPG 1st sustained E2 (10 minutes)y	Time from 1st probe to 1st sustained E2 (10 minutes)y	Time from the beginning of that probe to 1st sustained E2 (10 minutes)y	Time from the beginning of that probe to 1st E2y	Duration of np just after the probe of the first sustained E2	Duration of E2	% of probing spent in C	% of probing spent in E1	% of probing spent in E2	% E2 >10 min	% of probing spent in G
021215-ch1_.ANA	91	90	95	1	4	3	1	11	79	12190.5	16609.4	10750.3	1584.96	74.8	4199.41	4274.21	252.41	2612.48	2360.07	372.28	15859	15606.6	1085.08	380.49	260.75	81.15	64.7239	0.450346	25.2833	33.3333	9.54253
031115-ch1_.ANA	131	131	131	0	0	0	0	0	0	8530.6	20269.4	20269.4					618.77	28800	28181.2		28800	28181.2				88.09	100	0	0		0
110815-ch4_.ANA	109	109	110	0	1	1	1	60	49	12771	16029	14452.6		10.26	1566.14	1576.4	633.69	12696	12062.3	625.4	12706.3	12072.6	635.66	635.66	287.63	90.23	90.1653	0.0640091	9.77068	100	0
150715-ch1_.ANA	80	79	79	1	1	1	0	58	21	7232.26	21567.7	20024.5	1067.76	32.95	442.49	475.44	931.61	19989.3	19057.7	2315.5	28800	27868.4		2348.45		94.48	92.8449	0.152775	2.05163	0	4.95073
181115-ch1_(1).ANA	100	100	101	1	2	1	1	16	84	9640.59	19159.4	17368.1	668.92	33.43	1088.99	1122.42	776.67	5670.94	4894.27	395.54	5691.39	4914.72	415.99	415.99	312.48	107.55	90.6503	0.174484	5.68384	100	3.49134
181115-ch1_(2).ANA	82	82	82	0	0	0	0	0	0	11254.8	17545.2	17545.2					274	28800	28526		28800	28526				351.51	100	0	0		0
181215-ch1_(5).ANA	103	103	106	1	2	1	0	56	47	6803.68	21996.3	20169.3	1673.91	58.67	94.48	153.15	203.63	11676.8	11473.1	791.49	28800	28596.4		816.32		442.49	91.6938	0.266727	0.429527	0	7.60996
181215-ch4_.ANA	61	60	61	2	0	0	0	0	0	16064.9	12735.1	8577.1	4157.99				263.51	28800	28536.5		28800	28536.5				1088.99	67.3501	0	0		32.6499
190815-ch4_.ANA	117	117	119	0	2	2	1	112	5	16141.7	12658.2	11166.3		27.97	1463.91	1491.88	575.33	24952.4	24377	710.09	24967.7	24392.3	725.39	725.39	303.53	1373.68	88.2141	0.220964	11.5649	50	0
191115-ch1_(1).ANA	110	110	110	0	0	0	0	0	0	6836.22	21963.8	21963.8					71.09	28800	28728.9		28800	28728.9				1566.14	100	0	0		0
191115-ch1_(2).ANA	95	95	95	0	0	0	0	0	0	14477.8	14322.2	14322.2					579.88	28800	28220.1		28800	28220.1				2029.2	100	0	0		0
200815-ch4_.ANA	87	87	92	2	3	1	1	64	23	5373.63	23426.3	17078.3	2888	578.08	2881.98	3460.06	101.91	9406.15	9304.24	631.36	17316.4	17214.5	2011.6	2011.6		2881.98	72.902	2.46765	12.3023	100	12.328
200815-ch5_.ANA	53	52	54	1	1	1	1	4	48	14096.8	14703.2	12135.9	526.89	11.19	2029.2	2040.39	833.79	3704.63	2870.84	1112.15	3715.82	2882.03	1123.34	1123.34	48.08	4010.71	82.5393	0.0761059	13.8011	100	3.58351
220715-ch1_.ANA	95	94	96	1	2	2	0	94	0	11210.5	17589.5	14785.5	2303.62	60.74	439.6	500.34	94.25	25647.3	25553.1	1335.18	28800	28705.7		1362.39			84.0589	0.345319	2.49922	0	13.0966
270815-ch2_.ANA	212	211	211	0	0	0	0	0	0	14967.7	13832.2	13832.2					24.08	28800	28775.9		28800	28775.9					100	0	0		0

## Sheet: CYAZYPYR
	Number of np	Number of probes	Number of C	Number of G	Number of E1	Number of E2	Number of sustained E2 (longer than 10 minutes)	Number of probes to the 1st E1	Number of probes after 1st E	Total duration of np	Total probing time	Total duration of C	Duration of G	Total duration of E1	Total duration of E2	Total duration of E	Time to 1st probe from start of EPG	Time from start of EPG to 1st Ey	Time from 1st probe to 1st Ey	Time from the beginning of that probe to 1st Ey	Time to from start of EPG 1st sustained E2 (10 minutes)y	Time from 1st probe to 1st sustained E2 (10 minutes)y	Time from the beginning of that probe to 1st sustained E2 (10 minutes)y	Time from the beginning of that probe to 1st E2y	Duration of np just after the probe of the first sustained E2	Duration of E2	% of probing spent in C	% of probing spent in E1	% of probing spent in E2	% E2 >10 min	% of probing spent in G
031115-ch4_.ANA	26	24	25	0	0	0	0	0	0	25697.3	3102.67	3102.67					757.28	28800	28042.7		28800	28042.7					100	0	0		0
031115-ch5_.ANA	26	25	25	0	0	0	0	0	0	16656.8	12143.2	12143.2					757.65	28800	28042.3		28800	28042.3					100	0	0		0
071215-ch2_.ANA	101	100	100	1	0	0	0	0	0	20167.7	8632.28	7673.24	959.04				76.95	28800	28723		28800	28723					88.8901	0	0		11.1099
130815-ch3_ (7).ANA	35	34	34	0	0	0	0	0	0	26104.9	2695.04	2695.04					53.25	28800	28746.7		28800	28746.7					100	0	0		0
150715-ch4_.ANA	60	59	60	0	0	0	0	0	0	16821.7	11978.3	11978.3					304.38	28800	28495.6		28800	28495.6					100	0	0		0
180815-ch3_.ANA	10	9	9	0	0	0	0	0	0	28327.3	472.72	472.72					186.7	28800	28613.3		28800	28613.3					100	0	0		0
180815-ch4_.ANA	95	94	94	0	0	0	0	0	0	19227.2	9572.78	9572.78					214.79	28800	28585.2		28800	28585.2					100	0	0		0
200815-ch6_.ANA	42	41	41	0	0	0	0	0	0	24171.8	4628.16	4628.16					272.51	28800	28527.5		28800	28527.5					100	0	0		0
200815-ch7_.ANA	19	18	18	0	0	0	0	0	0	25123.7	3676.31	3676.31					1010.03	28800	27789.9		28800	27789.9					100	0	0		0
200815-ch8_.ANA	173	172	173	0	0	0	0	0	0	8011.46	20788.5	20788.5					257.34	28800	28542.6		28800	28542.6					100	0	0		0
220715-ch3_.ANA	12	11	11	0	0	0	0	0	0	28005.2	794.8	794.8					6.16	28800	28793.8		28800	28793.8					100	0	0		0
220715-ch5_.ANA	22	20	21	0	0	0	0	0	0	23794.3	5005.68	5005.68					21.66	28800	28778.3		28800	28778.3					100	0	0		0
240715-ch4_.ANA	19	18	18	0	0	0	0	0	0	26996	1803.99	1803.99					212.52	28800	28587.5		28800	28587.5					100	0	0		0
270815-ch3_.ANA	61	60	60	0	0	0	0	0	0	20398.2	8401.73	8401.73					873.29	28800	27926.7		28800	27926.7					100	0	0		0
270815-ch5_.ANA	78	76	77	0	0	0	0	0	0	18554.8	10245.2	10245.2					117.11	28800	28682.9		28800	28682.9					100	0	0		0

## Sheet: DAS-2
	Number of np	Number of probes	Number of C	Number of G	Number of E1	Number of E2	Number of sustained E2 (longer than 10 minutes)	Number of probes to the 1st E1	Number of probes after 1st E	Total duration of np	Total probing time	Total duration of C	Duration of G	Total duration of E1	Total duration of E2	Total duration of E	Time to 1st probe from start of EPG	Time from start of EPG to 1st Ey	Time from 1st probe to 1st Ey	Time from the beginning of that probe to 1st Ey	Time to from start of EPG 1st sustained E2 (10 minutes)y	Time from 1st probe to 1st sustained E2 (10 minutes)y	Time from the beginning of that probe to 1st sustained E2 (10 minutes)y	Time from the beginning of that probe to 1st E2y	Duration of np just after the probe of the first sustained E2	Duration of E2	% of probing spent in C	% of probing spent in E1	% of probing spent in E2	% of probing spent in G
031115-ch8_.ANA	13	12	12	0	0	0	0	0	0	28243.6	556.4	556.4					165.62	28800	28634.4		28800	28634.4					100	0	0	0
120815-ch1_.ANA	11	10	10	0	0	0	0	0	0	27809.7	990.27	990.27					0.02	28800	28800		28800	28800					100	0	0	0
151215-ch3_(7).ANA	11	10	10	0	0	0	0	0	0	27603.7	1196.28	1196.28					187.29	28800	28612.7		28800	28612.7					100	0	0	0
171115-ch2_.ANA	3	2	2	0	0	0	0	0	0	28740.2	59.83	59.83					123.02	28800	28677		28800	28677					100	0	0	0
171115-ch3_.ANA	12	11	11	0	0	0	0	0	0	28317.7	482.25	482.25					123.02	28800	28677		28800	28677					100	0	0	0
171115-ch4_(8).ANA	10	9	9	0	0	0	0	0	0	27661.8	1138.15	1138.15					21.98	28800	28778		28800	28778					100	0	0	0
181115-ch3_.ANA	2	1	1	0	0	0	0	0	0	28753.8	46.19	46.19					0.02	28800	28800		28800	28800					100	0	0	0
181115-ch4_.ANA	3	2	2	0	0	0	0	0	0	28749.3	50.73	50.73					1.97	28800	28798		28800	28798					100	0	0	0
181215-ch2_(6).ANA	4	3	3	0	0	0	0	0	0	28573.3	226.69	226.69					102.25	28800	28697.7		28800	28697.7					100	0	0	0
190815-ch2_.ANA	5	3	4	0	0	0	0	0	0	28596.2	203.77	203.77					164.13	28800	28635.8		28800	28635.8					100	0	0	0
190815-ch3_.ANA	4	3	3	0	0	0	0	0	0	28597	203.02	203.02					613.17	28800	28186.8		28800	28186.8					100	0	0	0
191115-ch2_.ANA	3	2	2	0	0	0	0	0	0	28701.1	98.91	98.91					605.47	28800	28194.5		28800	28194.5					100	0	0	0
210815-ch6_.ANA	18	17	17	0	0	0	0	0	0	27758.8	1041.22	1041.22					166.37	28800	28633.6		28800	28633.6					100	0	0	0
260815-ch6_.ANA	19	18	18	0	0	0	0	0	0	28226.8	573.24	573.24					781.92	28800	28018.1		28800	28018.1					100	0	0	0
280815-ch4_.ANA	15	14	14	0	0	0	0	0	0	27758.6	1041.4	1041.4					310.87	28800	28489.1		28800	28489.1					100	0	0	0
																														% of probing spent in G
																														0
																														0
																														0
																														0
																														0
																														0
																														0
																														0
																														0
																														0
																														0
																														0
																														0
																														0
																														0
																														% of probing spent in G
																														0
																														0
																														0
																														0
																														0
																														0
																														0
																														0
																														0
																														0
																														0
																														0
																														0
																														0
																														0
																														% of probing spent in G
																														0
																														0
																														0
																														0
																														0
																														0
																														0
																														0
																														0
																														0
																														0
																														0
																														0
																														0
																														0
																														% of probing spent in G
																														0
																														0
																														0
																														0
																														0
																														0
																														0
																														0
																														0
																														0
																														0
																														0
																														0
																														0
																														0
																														% of probing spent in G
																														0
																														0
																														0
																														0
																														0
																														0
																														0
																														0
																														0
																														0
																														0
																														0
																														0
																														0
																														0
																														% of probing spent in G
																														0
																														0
																														0
																														0
																														0
																														0
																														0
																														0
																														0
																														0
																														0
																														0
																														0
																														0
																														0
																														% of probing spent in G
																														0
																														0
																														0
																														0
																														0
																														0
																														0
																														0
																														0
																														0
																														0
																														0
																														0
																														0
																														0
																														% of probing spent in G
																														0
																														0
																														0
																														0
																														0
																														0
																														0
																														0
																														0
																														0
																														0
																														0
																														0
																														0
																														0
																														% of probing spent in G
																														0
																														0
																														0
																														0
																														0
																														0
																														0
																														0
																														0
																														0
																														0
																														0
																														0
																														0
																														0
																														% of probing spent in G
																														0
																														0
																														0
																														0
																														0
																														0
																														0
																														0
																														0
																														0
																														0
																														0
																														0
																														0
																														0
																														% of probing spent in G
																														0
																														0
																														0
																														0
																														0
																														0
																														0
																														0
																														0
																														0
																														0
																														0
																														0
																														0
																														0
																														% of probing spent in G
																														0
																														0
																														0
																														0
																														0
																														0
																														0
																														0
																														0
																														0
																														0
																														0
																														0
																														0
																														0
																														% of probing spent in G
																														0
																														0
																														0
																														0
																														0
																														0
																														0
																														0
																														0
																														0
																														0
																														0
																														0
																														0
																														0
																														% of probing spent in G
																														0
																														0
																														0
																														0
																														0
																														0
																														0
																														0
																														0
																														0
																														0
																														0
																														0
																														0
																														0
																														% of probing spent in G
																														0
																														0
																														0
																														0
																														0
																														0
																														0
																														0
																														0
																														0
																														0
																														0
																														0
																														0
																														0
																														% of probing spent in G
																														0
																														0
																														0
																														0
																														0
																														0
																														0
																														0
																														0
																														0
																														0
																														0
																														0
																														0
																														0
																														% of probing spent in G
																														0
																														0
																														0
																														0
																														0
																														0
																														0
																														0
																														0
																														0
																														0
																														0
																														0
																														0
																														0
																														% of probing spent in G
																														0
																														0
																														0
																														0
																														0
																														0
																														0
																														0
																														0
																														0
																														0
																														0
																														0
																														0
																														0
																														% of probing spent in G
																														0
																														0
																														0
																														0
																														0
																														0
																														0
																														0
																														0
																														0
																														0
																														0
																														0
																														0
																														0
																														% of probing spent in G
																														0
																														0
																														0
																														0
																														0
																														0
																														0
																														0
																														0
																														0
																														0
																														0
																														0
																														0
																														0
																														% of probing spent in G
																														0
																														0
																														0
																														0
																														0
																														0
																														0
																														0
																														0
																														0
																														0
																														0
																														0
																														0
																														0
																														% of probing spent in G
																														0
																														0
																														0
																														0
																														0
																														0
																														0
																														0
																														0
																														0
																														0
																														0
																														0
																														0
																														0
																														% of probing spent in G
																														0
																														0
																														0
																														0
																														0
																														0
																														0
																														0
																														0
																														0
																														0
																														0
																														0
																														0
																														0
																														% of probing spent in G
																														0
																														0
																														0
																														0
																														0
																														0
																														0
																														0
																														0
																														0
																														0
																														0
																														0
																														0
																														0
																														% of probing spent in G
																														0
																														0
																														0
																														0
																														0
																														0
																														0
																														0
																														0
																														0
																														0
																														0
																														0
																														0
																														0
																														% of probing spent in G
																														0
																														0
																														0
																														0
																														0
																														0
																														0
																														0
																														0
																														0
																														0
																														0
																														0
																														0
																														0
																														% of probing spent in G
																														0
																														0
																														0
																														0
																														0
																														0
																														0
																														0
																														0
																														0
																														0
																														0
																														0
																														0
																														0
																														% of probing spent in G
																														0
																														0
																														0
																														0
																														0
																														0
																														0
																														0
																														0
																														0
																														0
																														0
																														0
																														0
																														0
																														% of probing spent in G
																														0
																														0
																														0
																														0
																														0
																														0
																														0
																														0
																														0
																														0
																														0
																														0
																														0
																														0
																														0
																														% of probing spent in G
																														0
																														0
																														0
																														0
																														0
																														0
																														0
																														0
																														0
																														0
																														0
																														0
																														0
																														0
																														0
																														% of probing spent in G
																														0
																														0
																														0
																														0
																														0
																														0
																														0
																														0
																														0
																														0
																														0
																														0
																														0
																														0
																														0
																														% of probing spent in G
																														0
																														0
																														0
																														0
																														0
																														0
																														0
																														0
																														0
																														0
																														0
																														0
																														0
																														0
																														0
																														% of probing spent in G
																														0
																														0
																														0
																														0
																														0
																														0
																														0
																														0
																														0
																														0
																														0
																														0
																														0
																														0
																														0
																														% of probing spent in G
																														0
																														0
																														0
																														0
																														0
																														0
																														0
																														0
																														0
																														0
																														0
																														0
																														0
																														0
																														0
																														% of probing spent in G
																														0
																														0
																														0
																														0
																														0
																														0
																														0
																														0
																														0
																														0
																														0
																														0
																														0
																														0
																														0
																														% of probing spent in G
																														0
																														0
																														0
																														0
																														0
																														0
																														0
																														0
																														0
																														0
																														0
																														0
																														0
																														0
																														0
																														% of probing spent in G
																														0
																														0
																														0
																														0
																														0
																														0
																														0
																														0
																														0
																														0
																														0
																														0
																														0
																														0
																														0
																														% of probing spent in G
																														0
																														0
																														0
																														0
																														0
																														0
																														0
																														0
																														0
																														0
																														0
																														0
																														0
																														0
																														0
																														% of probing spent in G
																														0
																														0
																														0
																														0
																														0
																														0
																														0
																														0
																														0
																														0
																														0
																														0
																														0
																														0
																														0
																														% of probing spent in G
																														0
																														0
																														0
																														0
																														0
																														0
																														0
																														0
																														0
																														0
																														0
																														0
																														0
																														0
																														0
																														% of probing spent in G
																														0
																														0
																														0
																														0
																														0
																														0
																														0
																														0
																														0
																														0
																														0
																														0
																														0
																														0
																														0
																														% of probing spent in G
																														0
																														0
																														0
																														0
																														0
																														0
																														0
																														0
																														0
																														0
																														0
																														0
																														0
																														0
																														0
																														% of probing spent in G
																														0
																														0
																														0
																														0
																														0
																														0
																														0
																														0
																														0
																														0
																														0
																														0
																														0
																														0
																														0
																														% of probing spent in G
																														0
																														0
																														0
																														0
																														0
																														0
																														0
																														0
																														0
																														0
																														0
																														0
																														0
																														0
																														0
																														% of probing spent in G
																														0
																														0
																														0
																														0
																														0
																														0
																														0
																														0
																														0
																														0
																														0
																														0
																														0
																														0
																														0
																														% of probing spent in G
																														0
																														0
																														0
																														0
																														0
																														0
																														0
																														0
																														0
																														0
																														0
																														0
																														0
																														0
																														0
																														% of probing spent in G
																														0
																														0
																														0
																														0
																														0
																														0
																														0
																														0
																														0
																														0
																														0
																														0
																														0
																														0
																														0
																														% of probing spent in G
																														0
																														0
																														0
																														0
																														0
																														0
																														0
																														0
																														0
																														0
																														0
																														0
																														0
																														0
																														0
																														% of probing spent in G
																														0
																														0
																														0
																														0
																														0
																														0
																														0
																														0
																														0
																														0
																														0
																														0
																														0
																														0
																														0
																														% of probing spent in G
																														0
																														0
																														0
																														0
																														0
																														0
																														0
																														0
																														0
																														0
																														0
																														0
																														0
																														0
																														0
																														% of probing spent in G
																														0
																														0
																														0
																														0
																														0
																														0
																														0
																														0
																														0
																														0
																														0
																														0
																														0
																														0
																														0
																														% of probing spent in G
																														0
																														0
																														0
																														0
																														0
																														0
																														0
																														0
																														0
																														0
																														0
																														0
																														0
																														0
																														0
																														% of probing spent in G
																														0
																														0
																														0
																														0
																														0
																														0
																														0
																														0
																														0
																														0
																														0
																														0
																														0
																														0
																														0
																														% of probing spent in G
																														0
																														0
																														0
																														0
																														0
																														0
																														0
																														0
																														0
																														0
																														0
																														0
																														0
																														0
																														0
																														% of probing spent in G
																														0
																														0
																														0
																														0
																														0
																														0
																														0
																														0
																														0
																														0
																														0
																														0
																														0
																														0
																														0
																														% of probing spent in G
																														0
																														0
																														0
																														0
																														0
																														0
																														0
																														0
																														0
																														0
																														0
																														0
																														0
																														0
																														0
																														% of probing spent in G
																														0
																														0
																														0
																														0
																														0
																														0
																														0
																														0
																														0
																														0
																														0
																														0
																														0
																														0
																														0
																														% of probing spent in G
																														0
																														0
																														0
																														0
																														0
																														0
																														0
																														0
																														0
																														0
																														0
																														0
																														0
																														0
																														0
																														% of probing spent in G
																														0
																														0
																														0
																														0
																														0
																														0
																														0
																														0
																														0
																														0
																														0
																														0
																														0
																														0
																														0
																														% of probing spent in G
																														0
																														0
																														0
																														0
																														0
																														0
																														0
																														0
																														0
																														0
																														0
																														0
																														0
																														0
																														0
																														% of probing spent in G
																														0
																														0
																														0
																														0
																														0
																														0
																														0
																														0
																														0
																														0
																														0
																														0
																														0
																														0
																														0
																														% of probing spent in G
																														0
																														0
																														0
																														0
																														0
																														0
																														0
																														0
																														0
																														0
																														0
																														0
																														0
																														0
																														0
																														% of probing spent in G
																														0
																														0
																														0
																														0
																														0
																														0
																														0
																														0
																														0
																														0
																														0
																														0
																														0
																														0
																														0

## Sheet: FLUPYRADIFURONE
	Number of np	Number of probes	Number of C	Number of G	Number of E1	Number of E2	Number of sustained E2 (longer than 10 minutes)	Number of probes to the 1st E1	Number of probes after 1st E	Total duration of np	Total probing time	Total duration of C	Duration of G	Total duration of E1	Total duration of E2	Total duration of E	Time to 1st probe from start of EPG	Time from start of EPG to 1st Ey	Time from 1st probe to 1st Ey	Time from the beginning of that probe to 1st Ey	Time to from start of EPG 1st sustained E2 (10 minutes)y	Time from 1st probe to 1st sustained E2 (10 minutes)y	Time from the beginning of that probe to 1st sustained E2 (10 minutes)y	Time from the beginning of that probe to 1st E2y	Duration of np just after the probe of the first sustained E2	Duration of E2	% of probing spent in C	% of probing spent in E1	% of probing spent in E2	% E2 >10 min	% of probing spent in G
071215-ch4_.ANA	15	14	14	0	0	0	0	0	0	25355	3445.03	3445.03					17.74	28800	28782.2		28800	28782.2					100	0	0		0
071215-ch6_.ANA	34	33	33	0	0	0	0	0	0	21980.2	6819.83	6819.83					352.99	28800	28447		28800	28447					100	0	0		0
071215-ch8_.ANA	47	47	47	1	0	0	0	0	0	19701	9098.96	6620.97	2477.99				1278.81	28800	27521.2		28800	27521.2					72.7662	0	0		27.2338
120815-ch1_.ANA	5	4	4	0	0	0	0	0	0	26692.4	2107.56	2107.56					181.87	28800	28618.1		28800	28618.1					100	0	0		0
140815-ch1_(5).ANA	3	2	2	0	0	0	0	0	0	28737.9	62.1	62.1					226.2	28800	28573.8		28800	28573.8					100	0	0		0
151215-ch2_(6).ANA	20	19	19	0	0	0	0	0	0	27563.8	1236.23	1236.23					402.23	28800	28397.8		28800	28397.8					100	0	0		0
151215-ch3_.ANA	6	5	5	0	0	0	0	0	0	28299.1	500.93	500.93					470.98	28800	28329		28800	28329					100	0	0		0
190815-ch6_.ANA	11	9	10	0	0	0	0	0	0	27675.7	1124.34	1124.34					569.3	28800	28230.7		28800	28230.7					100	0	0		0
191115-ch2_.ANA	9	7	8	0	0	0	0	0	0	28496.9	303.12	303.12					325.51	28800	28474.5		28800	28474.5					100	0	0		0
210715-ch8_.ANA	13	12	12	0	0	0	0	0	0	28208.8	591.17	591.17					110.31	28800	28689.7		28800	28689.7					100	0	0		0
210815-ch2_.ANA	57	57	57	0	0	0	0	0	0	21706.7	7093.27	7093.27					1.77	28800	28798.2		28800	28798.2					100	0	0		0
210815-ch3_.ANA	15	14	14	0	0	0	0	0	0	27075.4	1724.58	1724.58					5.26	28800	28794.7		28800	28794.7					100	0	0		0
280815-ch1_.ANA	5	3	4	0	0	0	0	0	0	28725	75.03	75.03					26.58	28800	28773.4		28800	28773.4					100	0	0		0
280815-ch2_.ANA	19	18	18	0	0	0	0	0	0	24396.3	4403.69	4403.69					306.14	28800	28493.8		28800	28493.8					100	0	0		0
280815-ch3_.ANA	8	7	7	0	0	0	0	0	0	28569.6	230.39	230.39					394.92	28800	28405.1		28800	28405.1					100	0	0		0
																Total duration of E
																Total duration of E
																Total duration of E
																Total duration of E
																Total duration of E
																Total duration of E
																Total duration of E
																Total duration of E
																Total duration of E
																Total duration of E
																Total duration of E
																Total duration of E
																Total duration of E
																Total duration of E
																Total duration of E
																Total duration of E
																Total duration of E
																Total duration of E
																Total duration of E
																Total duration of E
																Total duration of E
																Total duration of E
																Total duration of E
																Total duration of E
																Total duration of E
																Total duration of E
																Total duration of E
																Total duration of E
																Total duration of E
																Total duration of E
																Total duration of E
																Total duration of E
																Total duration of E
																Total duration of E
																Total duration of E
																Total duration of E
																Total duration of E
																Total duration of E
																Total duration of E
																Total duration of E
																Total duration of E
																Total duration of E
																Total duration of E
																Total duration of E
																Total duration of E
																Total duration of E
																Total duration of E
																Total duration of E
																Total duration of E
																Total duration of E
																Total duration of E
																Total duration of E
																Total duration of E
																Total duration of E
																Total duration of E
																Total duration of E
																Total duration of E
																Total duration of E
																Total duration of E
																Total duration of E
																Total duration of E
																Total duration of E
																Total duration of E

## Sheet: PYMETROZINE
	Number of np	Number of probes	Number of C	Number of G	Number of E1	Number of E2	Number of sustained E2 (longer than 10 minutes)	Number of probes to the 1st E1	Number of probes after 1st E	Total duration of np	Total probing time	Total duration of C	Duration of G	Total duration of E1	Total duration of E2	Total duration of E	Time to 1st probe from start of EPG	Time from start of EPG to 1st Ey	Time from 1st probe to 1st Ey	Time from the beginning of that probe to 1st Ey	Time to from start of EPG 1st sustained E2 (10 minutes)y	Time from 1st probe to 1st sustained E2 (10 minutes)y	Time from the beginning of that probe to 1st sustained E2 (10 minutes)y	Time from the beginning of that probe to 1st E2y	Duration of np just after the probe of the first sustained E2	Duration of E2	% of probing spent in C	% of probing spent in E1	% of probing spent in E2	% E2 >10 min	% of probing spent in G
021215-ch1_(5).ANA	20	19	23	2	3	0	0	16	3	13031.1	15768.9	10576.4	5153.83	38.6		38.6	445.24	7508.43	7063.19	2914.08	28800	28354.8				51.13	67.0717	0.244786	0		32.6836
021215-ch2_(6).ANA	37	37	37	0	0	0	0	0	0	23054.1	5745.85	5745.85					381.07	28800	28418.9		28800	28418.9				121.08	100	0	0		0
021215-ch3_(7).ANA	23	22	22	0	0	0	0	0	0	18070	10730	10730					329.21	28800	28470.8		28800	28470.8				2587.71	100	0	0		0
021215-ch4_(8).ANA	46	45	48	1	2	1	1	37	8	15165.8	13634.2	8012.43	831.7	66.27	4723.78	4790.05	700.04	17700.9	17000.9	780.18	17968.1	17268.1	1047.4	1047.4	2228.91	3410.15	58.7672	0.486058	34.6466	100	6.10011
021215-ch4_.ANA	53	53	53	0	0	0	0	0	0	19500.4	9299.62	9299.62					128.62	28800	28671.4		28800	28671.4				4723.78	100	0	0		0
041215-ch2_.ANA	88	87	91	1	2	2	1	35	52	11775	17025	10204.5	3330.94	28.32	3461.28	3489.6	56.37	8069.92	8013.55	780.36	21665.7	21609.3	59.33	798.65	2189.3		59.9381	0.166343	20.3305	50	19.565
041215-ch3_.ANA	28	27	29	1	1	0	0	25	2	16011.7	12788.3	10562.7	2211.45	14.18		14.18	249.65	24113.9	23864.3	1268.47	28800	28550.3					82.5964	0.110882	0		17.2927
130815-ch1_.ANA	34	34	34	0	0	0	0	0	0	22775.3	6024.73	6024.73					1013.43	28800	27786.6		28800	27786.6					100	0	0		0
181215-ch2_.ANA	67	67	67	0	0	0	0	0	0	10883.3	17916.7	17916.7					8.86	28800	28791.1		28800	28791.1					100	0	0		0
181215-ch3_.ANA	37	36	38	1	1	1	0	35	1	14651.4	14148.6	9125.89	4878.16	23.45	121.08	144.53	3.15	15026	15022.9	783.35	28800	28796.8		806.8			64.5004	0.165741	0.855775	0	34.4781
200815-ch1_.ANA	131	130	130	0	0	0	0	0	0	11873.3	16926.6	16926.6					8.28	28799.9	28791.7		28799.9	28791.7					100	0	0		0
250815-ch5_.ANA	30	30	30	1	0	0	0	0	0	23285.8	5514.23	4270.57	1243.66				1234.97	28800	27565		28800	27565					77.4464	0	0		22.5536
250815-ch6_.ANA	23	22	24	1	1	0	0	22	0	22520.9	6279.07	4208.43	2051.82	18.82		18.82	224.52	22164.5	21940	1634.97	28800	28575.5					67.0231	0.299726	0		32.6771
270815-ch6_.ANA	46	46	47	0	1	1	1	32	14	11823.6	16976.3	14363.4		25.2	2587.71	2612.91	959.81	17374.3	16414.5	1572.03	17399.5	16439.7	1597.23	1597.23	20.39		84.6085	0.148442	15.243	100	0
270815-ch8_.ANA	57	56	56	0	0	0	0	0	0	17665.8	11134.2	11134.2					42.85	28800	28757.1		28800	28757.1					100	0	0		0

## Sheet: Raw data EPG whitefly
	Number of np	Total duration of np	Number of probes	Total probing time	Number of C	Total duration of C	Number of G	Duration of G	Number of E1	Total duration of E1	Number of E2	Total duration of E2	Number of sustained E2 (longer than 10 minutes)	Total duration of E	Time to 1st probe from start of EPG	Time from start of EPG to 1st Ey	Time from 1st probe to 1st Ey	Time from the beginning of that probe to 1st Ey	Time to from start of EPG 1st sustained E2 (10 minutes)y	Time from 1st probe to 1st sustained E2 (10 minutes)y	Time from the beginning of that probe to 1st sustained E2 (10 minutes)y	Time from the beginning of that probe to 1st E2y	Duration of np just after the probe of the first sustained E2	% of probing spent in C	% of probing spent in E1	% of probing spent in E2	% E2 >10 min	% of probing spent in G
untreated	91	12190.5	90	16609.4	95	10750.3	1	1584.96	4	74.8	3	4199.41	1	4274.21	252.41	2612.48	2360.07	372.28	15859	15606.6	1085.08	380.49	260.75	64.7239	0.450346	25.2833	33.3333	9.54253
untreated	131	8530.6	131	20269.4	131	20269.4	0	0	0	0	0	0	0	0	618.77	28800	28181.2		28800	28181.2				100	0	0		0
untreated	109	12771	109	16029	110	14452.6	0	0	1	10.26	1	1566.14	1	1576.4	633.69	12696	12062.3	625.4	12706.3	12072.6	635.66	635.66	287.63	90.1653	0.0640091	9.77068	100	0
untreated	80	7232.26	79	21567.7	79	20024.5	1	1067.76	1	32.95	1	442.49	0	475.44	931.61	19989.3	19057.7	2315.5	28800	27868.4		2348.45		92.8449	0.152775	2.05163	0	4.95073
untreated	100	9640.59	100	19159.4	101	17368.1	1	668.92	2	33.43	1	1088.99	1	1122.42	776.67	5670.94	4894.27	395.54	5691.39	4914.72	415.99	415.99	312.48	90.6503	0.174484	5.68384	100	3.49134
untreated	82	11254.8	82	17545.2	82	17545.2	0	0	0	0	0	0	0	0	274	28800	28526		28800	28526				100	0	0		0
untreated	103	6803.68	103	21996.3	106	20169.2	1	1673.91	2	58.67	1	94.48	0	153.15	203.63	11676.8	11473.1	791.49	28800	28596.4		816.32		91.6938	0.266727	0.429527	0	7.60996
untreated	61	16064.9	60	12735.1	61	8577.1	2	4157.99	0	0	0	0	0	0	263.51	28800	28536.5		28800	28536.5				67.3501	0	0		32.6499
untreated	117	16141.7	117	12658.2	119	11166.3	0	0	2	27.97	2	1463.91	1	1491.88	575.33	24952.4	24377	710.09	24967.7	24392.3	725.39	725.39	303.53	88.2141	0.220964	11.5649	50	0
untreated	110	6836.22	110	21963.8	110	21963.8	0	0	0	0	0	0	0	0	71.09	28800	28728.9		28800	28728.9				100	0	0		0
untreated	95	14477.8	95	14322.2	95	14322.2	0	0	0	0	0	0	0	0	579.88	28800	28220.1		28800	28220.1				100	0	0		0
untreated	87	5373.63	87	23426.3	92	17078.3	2	2888	3	578.08	1	2881.98	1	3460.06	101.91	9406.15	9304.24	631.36	17316.4	17214.5	2011.6	2011.6		72.902	2.46765	12.3023	100	12.328
untreated	53	14096.8	52	14703.2	54	12135.9	1	526.89	1	11.19	1	2029.2	1	2040.39	833.79	3704.63	2870.84	1112.15	3715.82	2882.03	1123.34	1123.34	48.08	82.5393	0.0761059	13.8011	100	3.58351
untreated	95	11210.5	94	17589.5	96	14785.5	1	2303.62	2	60.74	2	439.6	0	500.34	94.25	25647.3	25553.1	1335.18	28800	28705.7		1362.39		84.0589	0.345319	2.49922	0	13.0966
untreated	212	14967.7	211	13832.2	211	13832.2	0	0	0	0	0	0	0	0	24.08	28800	28775.9		28800	28775.9				100	0	0		0
cyazypir	26	25697.3	24	3102.67	25	3102.67	0	0	0	0	0	0	0	0	757.28	28800	28042.7		28800	28042.7				100	0	0		0
cyazypir	26	16656.8	25	12143.2	25	12143.2	0	0	0	0	0	0	0	0	757.65	28800	28042.3		28800	28042.3				100	0	0		0
cyazypir	101	20167.7	100	8632.28	100	7673.24	1	959.04	0	0	0	0	0	0	76.95	28800	28723		28800	28723				88.8901	0	0		11.1099
cyazypir	35	26104.9	34	2695.04	34	2695.04	0	0	0	0	0	0	0	0	53.25	28800	28746.7		28800	28746.7				100	0	0		0
cyazypir	60	16821.7	59	11978.3	60	11978.3	0	0	0	0	0	0	0	0	304.38	28800	28495.6		28800	28495.6				100	0	0		0
cyazypir	10	28327.3	9	472.72	9	472.72	0	0	0	0	0	0	0	0	186.7	28800	28613.3		28800	28613.3				100	0	0		0
cyazypir	95	19227.2	94	9572.78	94	9572.78	0	0	0	0	0	0	0	0	214.79	28800	28585.2		28800	28585.2				100	0	0		0
cyazypir	42	24171.8	41	4628.16	41	4628.16	0	0	0	0	0	0	0	0	272.51	28800	28527.5		28800	28527.5				100	0	0		0
cyazypir	19	25123.7	18	3676.31	18	3676.31	0	0	0	0	0	0	0	0	1010.03	28800	27789.9		28800	27789.9				100	0	0		0
cyazypir	173	8011.46	172	20788.5	173	20788.5	0	0	0	0	0	0	0	0	257.34	28800	28542.6		28800	28542.6				100	0	0		0
cyazypir	12	28005.2	11	794.8	11	794.8	0	0	0	0	0	0	0	0	6.16	28800	28793.8		28800	28793.8				100	0	0		0
cyazypir	22	23794.3	20	5005.68	21	5005.68	0	0	0	0	0	0	0	0	21.66	28800	28778.3		28800	28778.3				100	0	0		0
cyazypir	19	26996	18	1803.99	18	1803.99	0	0	0	0	0	0	0	0	212.52	28800	28587.5		28800	28587.5				100	0	0		0
cyazypir	61	20398.2	60	8401.73	60	8401.73	0	0	0	0	0	0	0	0	873.29	28800	27926.7		28800	27926.7				100	0	0		0
cyazypir	78	18554.8	76	10245.2	77	10245.2	0	0	0	0	0	0	0	0	117.11	28800	28682.9		28800	28682.9				100	0	0		0
Flupiradirurone	15	25355	14	3445.03	14	3445.03	0	0	0	0	0	0	0	0	17.74	28800	28782.2		28800	28782.2				100	0	0		0
Flupiradirurone	34	21980.2	33	6819.83	33	6819.83	0	0	0	0	0	0	0	0	352.99	28800	28447		28800	28447				100	0	0		0
Flupiradirurone	47	19701	47	9098.96	47	6620.97	1	2477.99	0	0	0	0	0	0	1278.81	28800	27521.2		28800	27521.2				72.7662	0	0		27.2338
Flupiradirurone	5	26692.4	4	2107.56	4	2107.56	0	0	0	0	0	0	0	0	181.87	28800	28618.1		28800	28618.1				100	0	0		0
Flupiradirurone	3	28737.9	2	62.1	2	62.1	0	0	0	0	0	0	0	0	226.2	28800	28573.8		28800	28573.8				100	0	0		0
Flupiradirurone	20	27563.8	19	1236.23	19	1236.23	0	0	0	0	0	0	0	0	402.23	28800	28397.8		28800	28397.8				100	0	0		0
Flupiradirurone	6	28299.1	5	500.93	5	500.93	0	0	0	0	0	0	0	0	470.98	28800	28329		28800	28329				100	0	0		0
Flupiradirurone	11	27675.7	9	1124.34	10	1124.34	0	0	0	0	0	0	0	0	569.3	28800	28230.7		28800	28230.7				100	0	0		0
Flupiradirurone	9	28496.9	7	303.12	8	303.12	0	0	0	0	0	0	0	0	325.51	28800	28474.5		28800	28474.5				100	0	0		0
Flupiradirurone	13	28208.8	12	591.17	12	591.17	0	0	0	0	0	0	0	0	110.31	28800	28689.7		28800	28689.7				100	0	0		0
Flupiradirurone	57	21706.7	57	7093.27	57	7093.27	0	0	0	0	0	0	0	0	1.77	28800	28798.2		28800	28798.2				100	0	0		0
Flupiradirurone	15	27075.4	14	1724.58	14	1724.58	0	0	0	0	0	0	0	0	5.26	28800	28794.7		28800	28794.7				100	0	0		0
Flupiradirurone	5	28725	3	75.03	4	75.03	0	0	0	0	0	0	0	0	26.58	28800	28773.4		28800	28773.4				100	0	0		0
Flupiradirurone	19	24396.3	18	4403.69	18	4403.69	0	0	0	0	0	0	0	0	306.14	28800	28493.8		28800	28493.8				100	0	0		0
Flupiradirurone	8	28569.6	7	230.39	7	230.39	0	0	0	0	0	0	0	0	394.92	28800	28405.1		28800	28405.1				100	0	0		0
Pymetrozine	20	13031.1	19	15768.9	23	10576.5	2	5153.83	3	38.6	0	0	0	38.6	445.24	7508.43	7063.19	2914.08	28800	28354.8				67.0717	0.244786	0		32.6836
Pymetrozine	37	23054.1	37	5745.85	37	5745.85	0	0	0	0	0	0	0	0	381.07	28800	28418.9		28800	28418.9				100	0	0		0
Pymetrozine	23	18070	22	10730	22	10730	0	0	0	0	0	0	0	0	329.21	28800	28470.8		28800	28470.8				100	0	0		0
Pymetrozine	46	15165.8	45	13634.2	48	8012.43	1	831.7	2	66.27	1	4723.78	1	4790.05	700.04	17700.9	17000.9	780.18	17968.1	17268.1	1047.4	1047.4	2228.91	58.7672	0.486058	34.6466	100	6.10011
Pymetrozine	53	19500.4	53	9299.62	53	9299.62	0	0	0	0	0	0	0	0	128.62	28800	28671.4		28800	28671.4				100	0	0		0
Pymetrozine	88	11775	87	17025	91	10204.5	1	3330.94	2	28.32	2	3461.28	1	3489.6	56.37	8069.92	8013.55	780.36	21665.7	21609.3	59.33	798.65	2189.3	59.9381	0.166343	20.3305	50	19.565
Pymetrozine	28	16011.7	27	12788.3	29	10562.7	1	2211.45	1	14.18	0	0	0	14.18	249.65	24113.9	23864.3	1268.47	28800	28550.3				82.5964	0.110882	0		17.2927
Pymetrozine	34	22775.3	34	6024.73	34	6024.73	0	0	0	0	0	0	0	0	1013.43	28800	27786.6		28800	27786.6				100	0	0		0
Pymetrozine	67	10883.3	67	17916.7	67	17916.7	0	0	0	0	0	0	0	0	8.86	28800	28791.1		28800	28791.1				100	0	0		0
Pymetrozine	37	14651.4	36	14148.6	38	9125.89	1	4878.16	1	23.45	1	121.08	0	144.53	3.15	15026	15022.9	783.35	28800	28796.8		806.8		64.5004	0.165741	0.855775	0	34.4781
Pymetrozine	131	11873.3	130	16926.6	130	16926.6	0	0	0	0	0	0	0	0	8.28	28799.9	28791.7		28799.9	28791.7				100	0	0		0
Pymetrozine	30	23285.8	30	5514.23	30	4270.57	1	1243.66	0	0	0	0	0	0	1234.97	28800	27565		28800	27565				77.4464	0	0		22.5536
Pymetrozine	23	22520.9	22	6279.07	24	4208.43	1	2051.82	1	18.82	0	0	0	18.82	224.52	22164.5	21940	1634.97	28800	28575.5				67.0231	0.299726	0		32.6771
Pymetrozine	46	11823.6	46	16976.3	47	14363.4	0	0	1	25.2	1	2587.71	1	2612.91	959.81	17374.3	16414.5	1572.03	17399.5	16439.7	1597.23	1597.23	20.39	84.6085	0.148442	15.243	100	0
Pymetrozine	57	17665.8	56	11134.2	56	11134.2	0	0	0	0	0	0	0	0	42.85	28800	28757.1		28800	28757.1				100	0	0		0

## Sheet: Raw data EPG aphid
		Number of np	Total duration of np	Number of probes	Total probing time	Number of C	Total duration of C	Number of G	Total Duration of G	Number of F	Total duration of F	Number of E1	Total duration of E1	Number of E2	Number of sustained E2 (longer than 10 minutes)	Total duration of E2	Total duration of E	Time to 1st probe from start of EPG	Time from the beginning of the 1st probe to first pd	Time from start of EPG to 1st E†	Time from 1st probe to 1st E†	Time from the beginning of that probe to 1st E†	Time to from start of EPG 1st sustained E2 (10 minutes)†	Time from 1st probe to 1st sustained E2 (10 minutes)†	Time from the beginning of that probe to 1st sustained E2 (10 minutes)†	Time from start of EPG to 1st E2†	Time from 1st probe to 1st E2†	Time from the beginning of that probe to 1st E2†	% of probing time spent in C	% of probing time spent in F	% of probing time spent in G	% of probing time spent in E1	% of probing time spent in E2	% no. of E2 >10 min
untreated	1	1	43.53	1	28756.5	3	1154.68	0	0	0	0	3	83.66	2	2	27518.1	27601.8	43.53	28756.5	247.59	204.06	204.06	263.2	219.67	219.67	263.2	219.67	219.67	4.01537	0	0	0.290926	95.6937	100
untreated	1	16	5858.45	16	22941.5	25	18576.8	1	2385.45	0	0	10	1572.02	2	0	407.23	1979.25	407.14	28392.8	5729.29	5322.15	1057.95	28800	28392.8		16810.1	16403	1208.61	80.9747	0	10.398	6.85229	1.77508	0
untreated	1	30	11628.6	30	17171.4	38	5464.26	0	0	2	4602.62	7	1256.65	1	1	5847.87	7104.52	12.79	28787.2	4501.95	4489.16	563.84	11972.8	11960	503.79	11972.8	11960	503.79	31.8219	26.804	0	7.31827	34.0559	100
untreated	1	12	2779.28	11	26020.7	16	2369.37	0	0	3	9626.11	3	185.31	1	1	13839.9	14025.2	15.97	28784	9246.45	9230.48	992.52	9273.33	9257.36	1019.4	9273.33	9257.36	1019.4	9.1057	36.994	0	0.712163	53.1881	100
untreated	1	17	5403.01	17	23397	26	7873.23	0	0	0	0	15	2890.35	6	2	12633.4	15523.8	294.02	28506	961.54	667.52	667.52	4485.38	4191.36	2223.62	3043.3	2749.28	781.54	33.6506	0	0	12.3535	53.9959	33.3333
untreated	1	9	1596.26	9	27203.7	10	3233.27	0	0	0	0	3	4471.25	2	1	19499.2	23970.5	210.99	28589	2270.67	2059.68	644.24	2296.17	2085.18	669.74	2296.17	2085.18	669.74	11.8854	0	0	16.4362	71.6785	50
untreated	1	26	3869.94	26	24930.1	30	4864.03	0	0	0	0	6	536.68	3	2	19529.3	20066	66.27	28733.7	976.89	910.62	418.66	994.38	928.11	436.15	994.38	928.11	436.15	19.5107	0	0	2.15274	78.3366	66.6667
untreated	1	16	4899.79	16	23900.2	20	6673.08	0	0	1	869	6	2430.58	3	2	13927.6	16358.1	611.42	28188.6	3522.85	2911.43	802.05	13561.1	12949.7	3921.34	3547.4	2935.98	826.6	27.9206	3.63595	0	10.1697	58.2738	66.6667
untreated	1	6	6991.45	5	21808.6	9	4322.02	0	0	1	1454.3	3	101.22	3	1	15931	16032.2	139.31	28660.7	830.83	691.52	691.52	853.51	714.2	714.2	853.51	714.2	714.2	19.818	6.66849	0	0.46413	73.0494	33.3333
untreated	1	8	1261.47	8	27538.5	12	5719.93	0	0	2	5140.96	6	689.39	3	2	15988.3	16677.6	26.96	28773	1150.5	1123.54	573.74	2210.39	2183.43	1633.63	1169.64	1142.68	592.88	20.7706	18.6682	0	2.50337	58.0577	66.6667
untreated	1	16	3874.86	16	24925.1	17	1571.41	0	0	1	742.69	1	42.55	1	1	22568.5	22611	6.84	28793.2	6188.96	6182.12	546.09	6231.51	6224.67	588.64	6231.51	6224.67	588.64	6.30452	2.97968	0	0.170711	90.5451	100
untreated	1	4	606.2	4	28193.8	4	1442.01	0	0	0	0	1	80.68	1	1	26671.1	26751.8	54.02	28746	2048.21	1994.19	1354.57	2128.89	2074.87	1435.25	2128.89	2074.87	1435.25	5.11464	0	0	0.286162	94.5992	100
untreated	1	33	12077.9	33	16722.1	39	9210.07	0	0	0	0	7	1331.38	2	1	6180.64	7512.02	110.34	28689.7	9519.05	9408.71	404.29	22826.8	22716.4	1920.01	11496.9	11386.6	735.9	55.0773	0	0	7.9618	36.9609	50
untreated	1	25	10875.4	25	17924.6	30	9675.73	0	0	1	3898.67	9	2165.98	5	1	2184.24	4350.22	184.3	28615.7	6967.82	6783.52	479.7	27370.3	27186	1154.59	6996.39	6812.09	508.27	53.9801	21.7504	0	12.0838	12.1857	20
untreated	1	6	10114.9	5	18685.2	7	936.86	0	0	0	0	2	38.28	2	2	17710	17748.3	140.79	28659.2	1217.36	1076.57	634.95	1239.22	1098.43	656.81	1239.22	1098.43	656.81	5.01393	0	0	0.204869	94.7812	100
untreated	1	14	3306.23	14	25493.8	17	3811.3	0	0	1	4348.27	3	192.58	1	1	17141.6	17334.2	169.4	28630.6	9275.86	9106.46	416.97	11658.4	11489	1863.87	11658.4	11489	1863.87	14.9499	17.0562	0	0.7554	67.2385	100
untreated	1	26	8723.36	26	20076.6	33	6649.28	0	0	1	6166.9	8	1230.53	1	1	6029.93	7260.46	2254.1	26545.9	5840.91	3586.81	531.6	13753	11498.9	702.1	13753	11498.9	702.1	33.1195	30.7168	0	6.12916	30.0346	100
untreated	1	40	12350.9	40	16449.1	45	6803.32	0	0	1	2640.67	6	1545.95	3	2	5459.15	7005.1	59.06	28740.9	4470.29	4411.23	1242.52	19216.2	19157.1	606.27	13184.2	13125.2	313.76	41.3599	16.0536	0	9.39839	33.1882	66.6667
Isoclast	2	14	8905.86	14	19894.1	18	9339.56	1	478.73	0	0	4	1416.34	2	1	8659.51	10075.9	40.29	28759.7	463.18	422.89	422.89	6702.39	6662.1	3656.31	496.67	456.38	456.38	46.9463	0	2.40639	7.11938	43.5279	50
Isoclast	2	15	9419.77	14	19380.2	23	13495.2	0	0	0	0	10	2665.25	2	2	3219.76	5885.01	166.98	28633	2310.11	2143.13	1160.34	14764.8	14597.9	1638.41	14764.8	14597.9	1638.41	69.634	0	0	13.7524	16.6136	100
Isoclast	2	23	20894.4	22	7905.57	23	5714.93	0	0	1	2190.64	0	0	0	0	0	0	382.44	28417.6	28800	28417.6		28800	28417.6		28800	28417.6		72.2899	27.7101	0	0	0
Isoclast	2	7	1756.56	7	27043.4	15	7962.21	0	0	2	13565.2	6	629.81	1	1	4886.18	5515.99	21.01	28779	1207.16	1186.15	1186.15	2554.04	2533.03	716.79	2554.04	2533.03	716.79	29.4423	50.1609	0	2.32888	18.0679	100
Isoclast	2	18	9219.28	18	19580.7	23	11209	1	1365.08	1	5811.24	4	1009.43	1	0	185.99	1195.42	149.6	28650.4	4878.06	4728.46	2172.09	28800	28650.4		4894.43	4744.83	2188.46	57.245	29.6784	6.97155	5.15522	0.949863	0
Isoclast	2	22	13700.6	22	14984	28	5360.92	0	0	2	8078.57	4	449.74	1	1	1094.77	1544.51		28684.6	1633.68	1633.68	586.2	2236.37	2236.37	1188.89	2236.37	2236.37	1188.89	35.7776	53.9146	0	3.00147	7.30626	100
Isoclast	2	10	16701.5	10	12098.5	12	3321.2	0	0	2	7928.44	2	213.75	1	1	635.11	848.86	244.13	28555.9	1547.74	1303.61	748.81	10957.7	10713.6	553.46	10957.7	10713.6	553.46	27.4513	65.5324	0	1.76675	5.24949	100
Isoclast	2	4	8206.15	4	20593.9	10	3433.84	0	0	4	11383	3	5151.42	1	1	625.64	5777.06	8.72	28791.3	19004	18995.2	10752.2	19323.4	19314.7	11071.7	19323.4	19314.7	11071.7	16.6741	55.2735	0	25.0144	3.03799	100
Isoclast	2	13	24410.9	12	4389.06	12	2026.9	0	0	2	2362.16	0	0	0	0	0	0	35.47	28764.5	28800	28764.5		28800	28764.5		28800	28764.5		46.1807	53.8193	0	0	0
Isoclast	2	29	20166.7	28	8633.35	32	5766.39	0	0	2	2765.65	3	101.31	0	0	0	101.31	32.29	28767.7	9618.01	9585.72	1095.28	28800	28767.7		28800	28767.7		66.792	32.0345	0	1.17347	0
Isoclast	2	12	13200.8	11	15599.2	19	5484.29	0	0	1	3115.17	10	2400.37	3	1	4599.38	6999.75	105.07	28694.9	1600.44	1495.37	1495.37	19584.4	19479.4	1002.29	2352	2246.93	2246.93	35.1575	19.97	0	15.3878	29.4847	33.3333
Isoclast	2	7	9609.18	6	19190.8	16	3827.25	0	0	5	13604.3	7	622.96	2	1	1136.27	1759.23	621.58	28178.4	11288.9	10667.4	354.7	16978.7	16357.1	1443.64	16285.8	15664.2	750.82	19.9431	70.8898	0	3.24614	5.9209	50
Isoclast	2	8	21668.1	7	7131.93	12	4783.35	0	0	1	1609.17	5	523.73	1	0	215.68	739.41	1332.91	27467.1	3522.46	2189.55	698.11	28800	27467.1		3556.44	2223.53	732.09	67.0695	22.5629	0	7.34345	3.02415	0
Isoclast	2	21	20995.8	21	7804.21	25	5036.25	0	0	1	1702.84	4	520.55	1	0	544.57	1065.12	126.38	28673.6	4394.91	4268.53	351.53	28800	28673.6		8839.42	8713.04	407.55	64.5325	21.8195	0	6.67012	6.9779	0
Isoclast	2	14	10092	13	18708	20	6135.98	0	0	3	11793.6	6	582.57	1	0	195.85	778.42	75.07	28724.9	3234.75	3159.68	1185.57	28800	28724.9		11197.8	11122.8	1024.13	32.7988	63.0403	0	3.11402	1.04688	0
Isoclast	2	24	12804	23	15996	27	12621.4	2	1278.26	0	0	2	81.74	1	1	2014.55	2096.29	109.54	28690.5	13286.6	13177.1	2433.47	15731.4	15621.9	684.6	15731.4	15621.9	684.6	78.9038	0	7.99112	0.511003	12.5941	100
Isoclast	2	42	10538.9	42	18261.1	53	8097.16	0	0	1	2953.09	11	1184.52	7	3	6026.38	7210.9	26.67	28773.3	1084.7	1058.03	434	1113.9	1087.23	463.2	1113.9	1087.23	463.2	44.3409	16.1714	0	6.48656	33.0011	42.8571
Isoclast	2	14	20439.9	13	8360.14	20	3965.01	1	511.27	3	3553.45	3	135.73	1	0	194.68	330.41	19.9	28780.1	6359.6	6339.7	4157.32	28800	28780.1		6383.41	6363.51	4181.13	47.4276	42.5047	6.11557	1.62354	2.32867	0
Isoclast	2	18	18677.8	18	10122.2	22	5115.48	0	0	4	4768.33	2	147.13	1	0	91.3	238.43	37.37	28762.6	5393.38	5356.01	478.35	28800	28762.6		5417.6	5380.23	502.57	50.537	47.1075	0	1.45353	0.901974	0
Flonicamid	3	17	11657.2	17	17142.8	25	8063.63	0	0	0	0	11	1792.65	6	3	7286.5	9079.15	573.94	28226.1	1430.87	856.93	623.86	5386.23	4812.29	1152.87	1459.24	885.3	652.23	47.0381	0	0	10.4572	42.5048	50
Flonicamid	3	31	4293.95	31	24506.1	46	18763.9	2	1179.44	0	0	14	3244.97	2	1	1317.71	4562.68	51.41	28748.6	798.22	746.81	746.81	824.31	772.9	772.9	824.31	772.9	772.9	76.5686	0	4.81285	13.2415	5.37708	50
Flonicamid	3	9	27905.2	8	894.85	10	788.27	0	0	0	0	2	106.58	0	0	0	106.58	10.62	28789.4	1022.43	1011.81	595.4	28800	28789.4		28800	28789.4		88.0896	0	0	11.9104	0
Flonicamid	3	17	23508.3	16	5291.66	18	1787.04	0	0	1	3362.88	1	141.74	0	0	0	141.74	146.94	28653.1	636.27	489.33	489.33	28800	28653.1		28800	28653.1		33.7709	63.5506	0	2.67855	0
Flonicamid	3	5	24318	4	4481.96	6	1537.96	0	0	3	2944	0	0	0	0	0	0	5714.12	23085.9	28800	23085.9		28800	23085.9		28800	23085.9		34.3145	65.6855	0	0	0
Flonicamid	3	2	26432.9	1	2367.11	1	463.28	0	0	0	0	1	42.85	1	1	1860.98	1903.83	144.09	28655.9	607.37	463.28	463.28	650.22	506.13	506.13	650.22	506.13	506.13	19.5715	0	0	1.81022	78.6182	100
Flonicamid	3	11	25791.9	10	3008.11	12	1948.91	0	0	0	0	3	461.17	1	0	598.03	1059.2	942.91	27857.1	3469.01	2526.1	813.37	28800	27857.1		3501.02	2558.11	845.38	64.7885	0	0	15.3309	19.8806	0
Flonicamid	3	4	14918.7	3	13881.3	6	1488.83	0	0	0	0	4	587.57	2	1	11804.9	12392.5	78.86	28721.1	2079.1	2000.24	1032.3	3114.52	3035.66	2067.72	2102.61	2023.75	1055.81	10.7254	0	0	4.2328	85.0418	50
Flonicamid	3	11	25654.2	10	3145.78	11	1423.49	0	0	1	1722.29	0	0	0	0	0	0	20.93	28779.1	28800	28779.1		28800	28779.1		28800	28779.1		45.2508	54.7492	0	0	0
Flonicamid	3	4	24797.2	3	4002.83	3	976.95	0	0	0	0	1	30.46	1	1	2995.42	3025.88	19.25	28780.8	1126.76	1107.51	906.05	1157.22	1137.97	936.51	1157.22	1137.97	936.51	24.4065	0	0	0.760962	74.8326	100
Flonicamid	3	24	17409.8	23	11390.2	25	2677.5	0	0	0	0	3	174.41	2	2	8538.29	8712.7	42.36	28757.6	7388.29	7345.93	543.96	7427.25	7384.89	582.92	7427.25	7384.89	582.92	23.507	0	0	1.53123	74.9617	100
Flonicamid	3	29	20146.6	28	8653.22	32	4573.42	0	0	1	2113.62	5	1715.05	1	0	251.13	1966.18	0.15	28799.8	1257.75	1257.6	824.95	28800	28799.8		9481.63	9481.48	564.93	52.8522	24.4258	0	19.8198	2.90216	0
Flonicamid	3	17	25129.1	16	3670.86	16	792.3	0	0	1	2878.56	0	0	0	0	0	0	710.61	28089.4	28800	28089.4		28800	28089.4		28800	28089.4		21.5835	78.4165	0	0	0
Flonicamid	3	27	16244.4	27	12555.6	28	10812	0	0	0	0	2	1587.7	1	0	155.9	1743.6	73.37	28726.6	1810.25	1736.88	1228.93	28800	28726.6		1836.57	1763.2	1255.25	86.1129	0	0	12.6454	1.24168	0
Flonicamid	3	6	28391.2	5	408.78	5	408.78	0	0	0	0	0	0	0	0	0	0	50.12	28749.9	28800	28749.9		28800	28749.9		28800	28749.9		100	0	0	0	0
Flonicamid	3	14	20305.5	13	8494.53	16	3386.23	0	0	1	4896.22	2	212.08	0	0	0	212.08	1259.06	27540.9	4727.34	3468.28	887.32	28800	27540.9		28800	27540.9		39.8637	57.6397	0	2.49667	0
Flonicamid	3	12	25191.8	11	3608.23	12	1993.46	0	0	0	0	2	535.33	1	1	1079.44	1614.77	8251.89	20548.1	15292.1	7040.25	1046.72	15315.8	7063.95	1070.42	15315.8	7063.95	1070.42	55.2476	0	0	14.8364	29.9161	100
Spirotetramat	4	9	4776.63	9	24023.4	11	3238.13	0	0	1	459.12	4	1987.1	3	2	18339	20326.1	33.27	28766.7	8289.9	8256.63	1308.18	9113.81	9080.54	2132.09	8354.02	8320.75	1372.3	13.4791	1.91114	0	8.27153	76.3382	66.6667
Spirotetramat	4	40	12080.7	40	16719.3	46	4337.29	0	0	3	8576.23	7	1066.27	3	1	2739.52	3805.79	8.11	28791.9	15708.2	15700.1	297.02	20437.3	20429.2	390.32	15741.4	15733.3	330.18	25.9418	51.2954	0	6.37748	16.3854	33.3333
Spirotetramat	4	7	2795.57	7	26004.4	7	1591.32	0	0	0	0	1	20.23	1	1	24392.9	24413.1	345.94	28454.1	4386.89	4040.95	1398.58	4407.12	4061.18	1418.81	4407.12	4061.18	1418.81	6.11942	0	0	0.0777944	93.8028	100
Spirotetramat	4	16	3393.58	16	25406.4	19	2509.39	0	0	0	0	5	329.28	3	2	22567.8	22897	152.09	28647.9	1788.48	1636.39	717.83	4211.07	4058.98	805.52	1823.96	1671.87	753.31	9.87699	0	0	1.29605	88.827	66.6667
Spirotetramat	4	4	2947.22	4	25852.8	4	2534.49	0	0	0	0	1	33.39	1	1	23284.9	23318.3	1142.57	27657.4	5481.71	4339.14	1365.32	5515.1	4372.53	1398.71	5515.1	4372.53	1398.71	9.80355	0	0	0.129154	90.0673	100
Spirotetramat	4	23	8808.38	23	19991.6	27	5161.7	2	2955.27	0	0	3	118.53	3	3	11756.1	11874.6	779.82	28020.2	14253.2	13473.4	3312.24	14290.1	13510.3	3349.16	14290.1	13510.3	3349.16	25.8193	0	14.7825	0.592898	58.8052	100
Spirotetramat	4	39	12715.4	38	16084.6	46	7849.64	0	0	1	4167.24	7	1146.72	5	1	2920.97	4067.69	495.51	28304.5	1219.57	724.06	262.01	1250.65	755.14	293.09	1250.65	755.14	293.09	48.8023	25.9083	0	7.12932	18.1601	20
Spirotetramat	4	18	13488.5	18	15311.5	25	4098.83	1	578.5	4	5039.69	6	673.11	3	2	4921.35	5594.46	250.83	28549.2	2620.21	2369.38	397.73	2643.37	2392.54	420.89	2643.37	2392.54	420.89	26.7697	32.9145	3.77821	4.39611	32.1416	66.6667
Spirotetramat	4	56	16115.5	56	12684.5	60	5940.56	0	0	2	6025.7	4	657.03	1	0	61.18	718.21	88.79	28711.2	2866.38	2777.59	416.94	28800	28711.2		2896.82	2808.03	447.38	46.8333	47.5045	0	5.1798	0.482322	0
Spirotetramat	4	24	9553.21	24	19246.8	30	5340.32	0	0	1	5134.44	6	728.46	1	1	8043.57	8772.03	400.95	28399	6593.62	6192.67	526.25	20756.4	20355.5	331.16	20756.4	20355.5	331.16	27.7465	26.6769	0	3.78484	41.7917	100
Spirotetramat	4	14	6024.34	14	22775.7	20	3529.66	0	0	1	3620.65	8	1240.81	3	1	14384.5	15625.3	34.14	28765.9	9439.95	9405.81	515.61	14704	14669.9	2114.72	10150.5	10116.3	1226.14	15.4975	15.897	0	5.44797	63.1575	33.3333
Spirotetramat	4	56	12653.3	55	16146.7	61	6935.71	0	0	2	8078.2	6	1012.43	2	0	120.38	1132.81	16.49	28783.5	7551.43	7534.94	6778.72	28800	28783.5		7577.29	7560.8	6804.58	42.9543	50.03	0	6.27019	0.745538	0
Spirotetramat	4	27	9374.66	27	19425.3	37	7469.29	0	0	2	8683.99	11	2139.44	3	0	1132.62	3272.06	12.77	28787.2	5168.84	5156.07	998.75	28800	28787.2		16869.9	16857.1	1252.83	38.4513	44.7044	0	11.0137	5.83063	0
Spirotetramat	4	24	5491.53	24	23308.5	29	3601.04	1	2474.38	2	1883.36	3	308.05	1	1	15041.6	15349.7	8.77	28791.2	5712.59	5703.82	633.47	12919.4	12910.6	517.19	12919.4	12910.6	517.19	15.4495	8.08015	10.6158	1.32162	64.5329	100
Spirotetramat	4	22	5793.47	22	23006.5	30	5459.3	0	0	0	0	9	1064.49	5	4	16482.7	17547.2	34.8	28765.2	2246.18	2211.38	459.64	5101.62	5066.82	2259.72	4273.66	4238.86	1431.76	23.7293	0	0	4.6269	71.6437	80
Spirotetramat	4	41	12369.3	41	16430.7	48	6346.33	0	0	1	2344.23	8	459.84	5	3	7280.26	7740.1	20.48	28779.5	2863.07	2842.59	291.97	10028	10007.5	567.09	2886.23	2865.75	315.13	38.6249	14.2674	0	2.79867	44.309	60
Spirotetramat	4	25	4571.12	25	24228.9	29	3533.1	0	0	1	7414.25	7	1363.82	4	2	11917.7	13281.5	33.68	28766.3	11016.8	10983.1	627.57	15581.5	15547.8	967.85	11029.8	10996.1	640.62	14.5822	30.6009	0	5.6289	49.188	50
Spirotetramat	4	12	4566.04	11	24234	14	1695.98	0	0	0	0	3	160.88	2	1	22377.1	22538	157.74	28642.3	2818.63	2660.89	537.36	5100.79	4943.05	537.88	2865.18	2707.44	583.91	6.99836	0	0	0.663862	92.3378	50
Spirotetramat	4	26	6256.22	26	22543.8	34	4637.77	1	2460.67	2	11267.6	10	1354.8	4	1	2822.98	4177.78	44.09	28755.9	18068.5	18024.4	516.48	23404.1	23360	897.17	18101	18056.9	549	20.5723	49.9808	10.9151	6.00964	12.5222	25
